# Supplementary material
Source: publisher site journal article supplement (http://kjim.org/upload/media/kjim-2022-215-Supplementary-Table-5.pdf)
Supplement: Supplementary file 1 [file kjim-2022-215-Supplementary-Table-5.pdf]

**Supplementary Table 5. Prescribed medications by age, gender, demographic characteristics, and health conditions**

|                                               | Age group     |              |               |                |               | Gender       |               | Cirrhosis status |                   | DAA exposure status |               | p value       |                 |
|-----------------------------------------------|---------------|--------------|---------------|----------------|---------------|--------------|---------------|------------------|-------------------|---------------------|---------------|---------------|-----------------|
|                                               | 18-34 years   | 35-44 years  | 45-54 years   | 55-64 years    | 65-74 years   | ≥ 75 years   | Male          | Female           | Without Cirrhosis | With Cirrhosis      | Unexposed     |               | Exposed         |
| <b>Total</b>                                  |               |              |               |                |               |              |               |                  |                   |                     |               |               |                 |
| Total hepatitis C infected patients           | 1,405 (2.8)   | 3,474 (6.9)  | 11,312 (22.4) | 15,536 (30.80) | 11,402 (22.6) | 7,347 (14.6) | 23,592 (46.7) | 26,884 (53.3)    | 47,850 (94.8)     | 2,626 (5.2)         | 27,232 (54.0) | 23,244 (46.0) | - <sup>a)</sup> |
| Patient with ≥ 1 prescribed medication        | 1,315 (93.6)  | 3,360 (96.7) | 11,092 (98.1) | 15,380 (99.90) | 11,363 (99.7) | 7,336 (99.9) | 23,236 (98.5) | 26,610 (99.9)    | 47,231 (98.7)     | 2,615 (99.6)        | 26,856 (98.6) | 22,990 (98.9) | - <sup>a)</sup> |
| Mean number of medications                    | 9.5           | 6.2          | 7.6           | 8.5            | 9.3           | 10.4         | 9.2           | 9.7              | 9.4               | 10.9                | 9.4           | 9.5           | - <sup>a)</sup> |
| <b>Comedications</b>                          |               |              |               |                |               |              |               |                  |                   |                     |               |               |                 |
| Analgesics                                    | 45,669 (91.6) | 1,123 (85.4) | 9,878 (89.1)  | 14,053 (91.4)  | 10,689 (94.1) | 6,986 (95.2) | 20,900 (89.9) | 24,769 (93.1)    | 43,270 (91.6)     | 2,399 (91.4)        | 24,613 (91.6) | 21,056 (91.6) | < 0.0001        |
| Gastrointestinal agents                       | 42,347 (85.0) | 955 (72.6)   | 9,018 (81.3)  | 13,111 (85.2)  | 10,042 (88.4) | 6,580 (89.7) | 19,140 (82.4) | 23,207 (87.2)    | 40,031 (84.8)     | 2,316 (88.2)        | 22,866 (85.1) | 19,481 (84.7) | < 0.0001        |
| Antibacterials                                | 40,013 (80.3) | 1,032 (78.5) | 8,574 (77.3)  | 12,236 (79.6)  | 9,421 (82.9)  | 6,127 (83.5) | 18,075 (77.8) | 21,938 (82.4)    | 37,851 (80.1)     | 2,162 (82.3)        | 21,591 (80.4) | 18,422 (80.1) | < 0.0001        |
| Antihistamines                                | 36,644 (73.5) | 873 (66.4)   | 7,615 (68.7)  | 11,163 (72.6)  | 8,863 (78.0)  | 5,778 (78.8) | 16,219 (69.8) | 20,425 (76.8)    | 34,649 (73.4)     | 1,995 (76.0)        | 19,715 (73.4) | 16,929 (73.6) | < 0.0001        |
| Anticoagulant, anti-platelet and fibrinolytic | 30,987 (62.2) | 699 (53.2)   | 1,925 (58.7)  | 9,510 (61.8)   | 7,532 (66.3)  | 4,809 (65.6) | 13,946 (60.0) | 17,041 (64.0)    | 29,395 (62.2)     | 1,592 (60.6)        | 16,812 (62.6) | 14,175 (61.7) | < 0.0001        |
| Steroids                                      | 29,152 (58.5) | 651 (49.5)   | 1,743 (51.9)  | 9,038 (58.8)   | 7,138 (62.8)  | 4,555 (62.1) | 12,586 (54.2) | 16,566 (62.3)    | 27,605 (58.4)     | 1,547 (58.9)        | 15,704 (58.5) | 13,448 (58.5) | < 0.0001        |
| Antiarrhythmics                               | 24,748 (49.6) | 380 (28.9)   | 1,123 (43.4)  | 7,716 (50.2)   | 6,540 (57.6)  | 4,171 (56.9) | 11,479 (49.4) | 13,269 (49.9)    | 23,318 (49.4)     | 1,430 (54.5)        | 13,331 (49.6) | 11,417 (49.7) | < 0.0001        |
| Anxiolytics/hypnotics/sedatives               | 21,737 (43.6) | 265 (20.2)   | 1,136 (33.8)  | 6,763 (44.0)   | 5,376 (47.3)  | 3,783 (51.6) | 9,525 (41.0)  | 12,212 (45.9)    | 20,369 (43.1)     | 1,368 (52.1)        | 11,762 (43.8) | 9,975 (43.4)  | < 0.0001        |
| Herbals/supplements/vitamins                  | 21,475 (43.1) | 266 (20.2)   | 1,050 (31.3)  | 6,419 (41.7)   | 5,370 (47.3)  | 4,064 (55.4) | 10,220 (44.0) | 11,255 (42.3)    | 19,896 (42.1)     | 1,579 (60.1)        | 11,588 (43.1) | 9,887 (43.0)  | < 0.0001        |
| Hepatotonics                                  | 19,302 (38.7) | 257 (19.5)   | 998 (29.7)    | 5,783 (37.6)   | 4,398 (38.7)  | 3,672 (50.1) | 10,386 (44.7) | 8,916 (33.5)     | 17,415 (36.9)     | 1,887 (71.9)        | 10,597 (39.5) | 8,705 (37.9)  | < 0.0001        |
| Hypertension/heart failure agents             | 18,692 (37.5) | 43 (3.3)     | 416 (12.4)    | 5,371 (34.9)   | 5,626 (49.5)  | 4,518 (61.6) | 9,072 (39.0)  | 9,620 (36.2)     | 17,262 (36.5)     | 1,430 (54.5)        | 10,004 (37.3) | 8,688 (37.3)  | < 0.0001        |

Supplementary Table 5. Continued

|                                  | Total         | Age group   |             |              |              |              |              | Gender       |              | Cirrhosis status  |                | DAA exposure status |              | p value  |
|----------------------------------|---------------|-------------|-------------|--------------|--------------|--------------|--------------|--------------|--------------|-------------------|----------------|---------------------|--------------|----------|
|                                  |               | 18-34 years | 35-44 years | 45-54 years  | 55-64 years  | 65-74 years  | ≥ 75 years   | Male         | Female       | Without Cirrhosis | With Cirrhosis | Unexposed           | Exposed      |          |
| Calcium channel blockers         | 14,586 (29.3) | 35 (2.7)    | 311 (9.3)   | 1,989 (17.9) | 4,160 (27.0) | 4,446 (39.1) | 3,645 (49.7) | 7,125 (30.7) | 7,461 (28.0) | 13,652 (28.9)     | 934 (35.6)     | 7,812 (29.1)        | 6,774 (29.5) | < 0.0001 |
| Lipid lowering agents            | 14,200 (28.5) | 53 (4.0)    | 389 (11.6)  | 2,229 (20.1) | 4,575 (29.7) | 4,195 (36.9) | 2,759 (37.6) | 6,354 (27.3) | 7,846 (29.5) | 13,528 (28.6)     | 672 (25.6)     | 8,418 (31.3)        | 5,782 (25.2) | < 0.0001 |
| Antidiabetics                    | 9,496 (19.1)  | 26 (2.0)    | 238 (7.1)   | 1,686 (15.2) | 2,865 (18.6) | 2,744 (24.1) | 1,937 (26.4) | 5,409 (23.3) | 4,087 (15.4) | 8,698 (18.4)      | 798 (30.4)     | 4,911 (18.3)        | 4,585 (19.9) | 0.0008   |
| Antidepressants                  | 9,412 (18.9)  | 122 (9.3)   | 474 (14.1)  | 1,913 (17.2) | 2,777 (18.1) | 2,275 (20.0) | 1,851 (25.2) | 4,044 (17.4) | 5,368 (20.2) | 8,823 (18.7)      | 589 (22.4)     | 5,074 (18.9)        | 4,338 (18.9) | < 0.0001 |
| Beta blockers                    | 8,576 (17.2)  | 64 (4.9)    | 315 (9.4)   | 1,311 (11.8) | 2,404 (15.6) | 2,431 (21.4) | 2,051 (28.0) | 4,124 (17.7) | 4,452 (16.7) | 7,838 (16.6)      | 738 (28.1)     | 4,618 (17.2)        | 3,958 (17.2) | < 0.0001 |
| Bronchodilators                  | 8,311 (16.7)  | 166 (12.6)  | 504 (15.0)  | 1,369 (12.3) | 2,473 (16.1) | 2,144 (18.9) | 1,655 (22.6) | 3,599 (15.5) | 4,712 (17.7) | 7,868 (16.7)      | 443 (16.9)     | 4,557 (17.0)        | 3,754 (16.3) | < 0.0001 |
| Anesthetics and muscle relaxants | 7,818 (15.7)  | 133 (10.1)  | 487 (14.5)  | 1,590 (14.3) | 2,438 (15.9) | 1,939 (17.1) | 1,231 (16.8) | 3,594 (15.5) | 4,224 (15.9) | 7,364 (15.6)      | 454 (17.3)     | 4,218 (15.7)        | 3,600 (15.7) | < 0.0001 |
| Antifungals                      | 7,671 (15.4)  | 263 (20.0)  | 743 (22.1)  | 1,891 (17.0) | 2,230 (14.5) | 1,601 (14.1) | 943 (12.9)   | 2,787 (12.0) | 4,884 (18.4) | 7,325 (15.5)      | 346 (13.2)     | 4,194 (15.6)        | 3,477 (15.1) | < 0.0001 |
| Anticonvulsants                  | 7,386 (14.8)  | 63 (4.8)    | 311 (9.3)   | 1,472 (13.3) | 2,140 (13.9) | 1,921 (16.9) | 1,479 (20.2) | 3,473 (14.9) | 3,91 (14.7)  | 6,91 (14.6)       | 475 (18.1)     | 3,911 (14.6)        | 3,475 (15.1) | < 0.0001 |

Values are presented as number (%).

DAA, direct-acting antiviral.

<sup>a</sup>p value not provided.
